# Supplementary material
Source: publisher site journal article supplement (https://www.dovepress.com/article/359545)
Supplement: Supplementary file 1 [file get_supplementary_file.php]

**Supplementary Table 1** The sequences of CSTF2 siRNAs.

|  | Sequences |
| --- | --- |
| si-NC | Sense: 5’-UUCUCCGAACGUGUCACGUTT-3’ |
|  | Antisense: 5’-ACGUGACACGUUCGGAGAATT-3’ |
| si-CSTF2#1 | Sense: 5’-GGAACAUGUUACUUCAGAATT-3’ |
|  | Antisense: 5’-UUCUGAAGUAACAUGUUCCTT-3’ |
| si-CSTF2#2 | Sense: 5’-UCAGGAUCCAAUGUGUCAATT-3’ |
|  | Antisense: 5’-UUGACACAUUGGAUCCUGATT-3’ |
| si-CSTF2#3 | Sense: 5’-GGAGGCAAGAGGGUUAGAUTT-3’ |
|  | Antisense: 5’-AUCUAACCCUCUUGCCUCCTT-3’ |


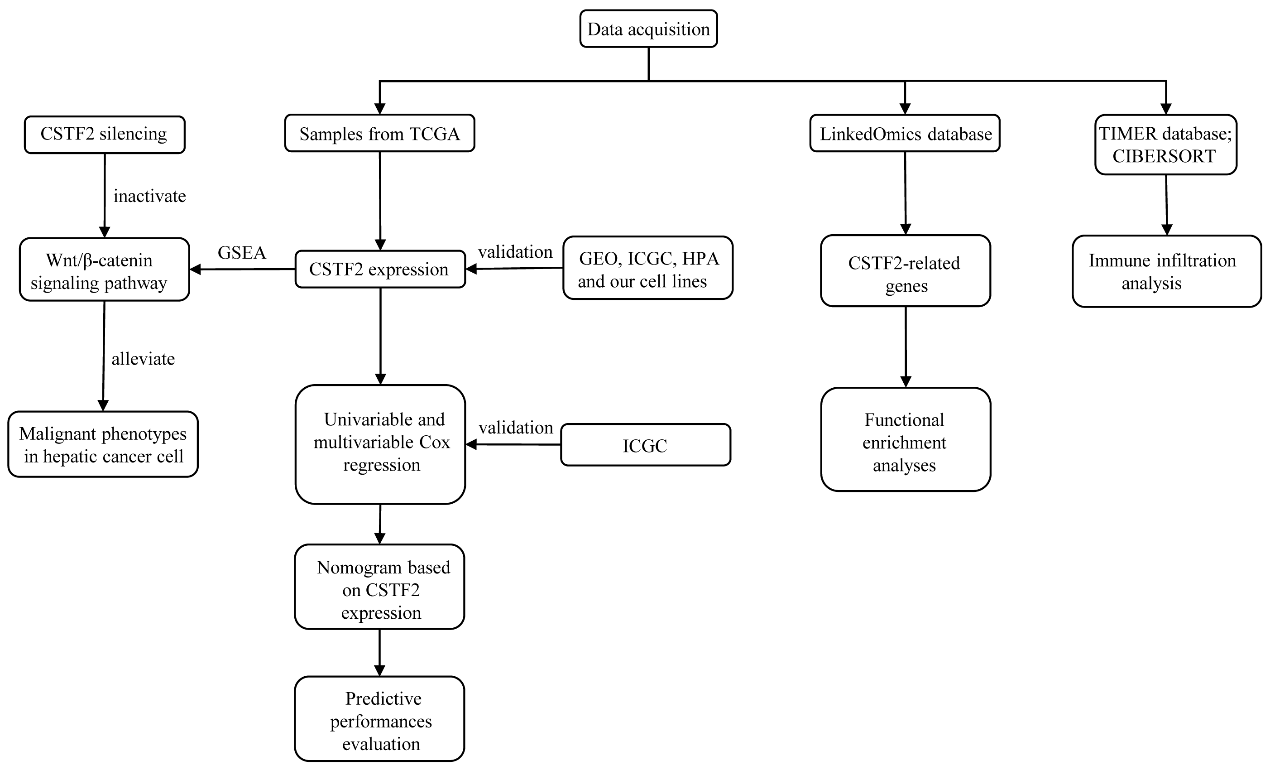


**Supplementary Figure 1** The analysis flow of this study.

**Abbreviation:** GSEA,gene set enrichment analysis.


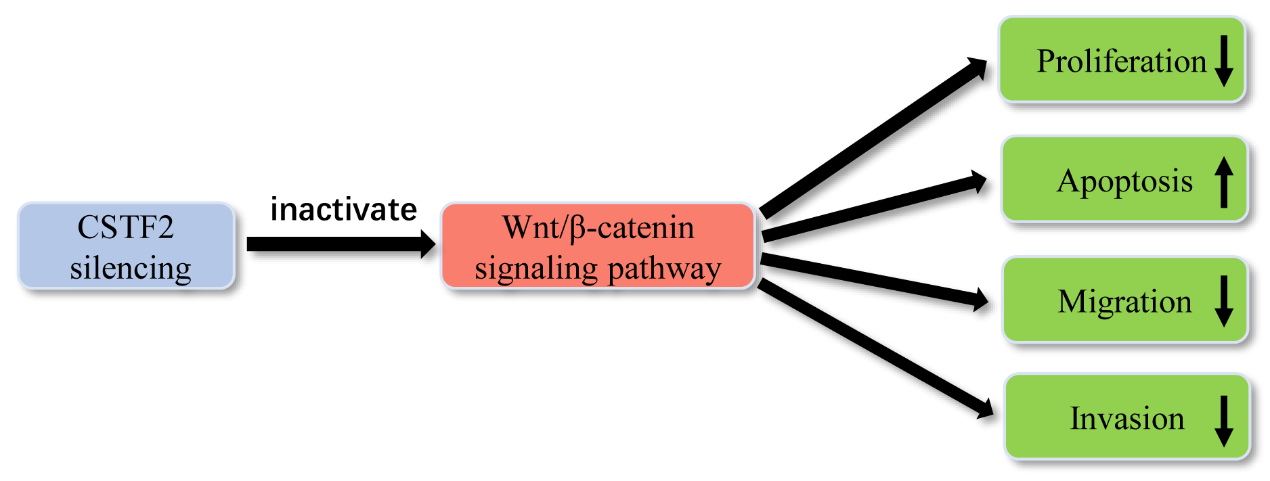


**Supplementary Figure 2** The mechanism of CSTF2 contributes to hepatocarcinogenesis.
